# Supplementary material
Source: HighWire-hosted journal article supplement (http://jmg.bmj.com/highwire/filestream/160026/field_highwire_adjunct_files/0/448537webonlyapp.xls)
Supplement: 448537webonlyapp.xls [file 448537webonlyapp.xls]

## Sheet: Feuil1
Name of the probe	Name of the Multiplex PCR	Primer	chromosome	Position from the p telomer: Genome Browser (http://genome.ucsc.edu/cgi-bin/hgGateway?org=human) May 2004
a5	MU 6	gccatctcccccactttaat	17	3783195
a5r	MU 6	ggagtccttgagcacctcag	17
a7	MU 7	gaaacaaagaaacggccttg	17	4831327
a7r	MU 7	cccccaagatacacactgga	17
b1	MU 8	tgacctcccagcctttctaa	17	5002371
b1r	MU 8	atgactgtggaagggtcagg	17
b3	MU 9	aagcccaaagctgtgctaaa	17	7114170
b3r	MU 9	ggtttaactgggggaggaaa	17
b4	MU10	cacctggtgtatcgaggtga	17	7328753
b4r	MU10	aggcacataactgggacagg	17
b6	MU 1	cacccaaatagctgctaccc	17	7760891
b6r	MU 1	aagccagagaaaggatggtg	17
c3	MU 2	gagccaaagagaccaacgtg	17	12872669
c3r	MU 2	ataatgatggggatgctgga	17
c7	MU 3	acgggaaaaagggagaaaaa	17	13599689
c7r	MU 3	cccgccccatcttaatgtat	17
d4	MU 4	ctgaacttgatcagccacca	17	5037968
d4r	MU 4	ctccaggtgtgtggtttgtg	17
e1	MU 5	gtggcatctcaactcggatt	17	15334895
e1r	MU 5	ccacctccactgctttctgt	17
e6	MU 6	gaatgggaatgtgtgggttg	17	17609468
e6r	MU 6	cccacaagaggagctgattg	17
f4	MU 7	atgaaccctgccgatattga	17	19448482
f4r	MU 7	gtggctgcttaaggctgaaa	17
f5ter	MU 8	attgagaccttcagtccctaccc	17	19449023
f5terr	MU 8	catccctcccaccaacttactc	17
f6	MU 9	caagtagatgcaggtgggtgt	17	20383762
f6r	MU 9	tcatctcaaaatggcactcg	17
f7	MU10	aggtgacatttggcttcctg	17	18431931
f7r	MU10	tagccttctgaggcttctgc	17
g2	MU 1	ggctggtggagggagttaat	17	4933450
g2r	MU 1	cttcctcttcctgcccttg	17
g4	MU 2	gtaccgtgtaccccgtgttt	17	3608858
g4r	MU 2	tgcctaccgaataaggcact	17
g6	MU 3	agtgcatctcaggaggagga	17	19970907
g6r	MU 3	ccagaggtggtttgctttgt	17
h3	MU 4	ttgcctgtatcaaaggcagtt	17	16135963
h3r	MU 4	ccacaaagtgaggggaacag	17
h4	MU 5	cagtctggggtcgctacagt	17	2494176
h4r	MU 5	tgttcagagtggctcactgg	17
h7	MU 6	ccacagaacattgcaacacc	17	16080514
h7r	MU 6	ttatggtaaagctgcccaca	17
j1	MU 7	ctaccatcattaactgggagcg	17	8003267
j1r	MU 7	atcttaaaagctttcttgcccc	17
j2	MU 8	tggttatgtgctgtaccctcag	17	7811857
j2r	MU 8	atgatgtagtaatcgtggtgcg	17
j3	MU 9	attacaacctccacccaagttc	17	6934228
j3r	MU 9	ttcacatcgctttgagattttc	17
j4	MU10	ctttgacctactggccatcttc	17	4267197
j4r	MU10	aaaggacagaaaatgtcgttgc	17
j5	MU 1	gtgaaaacagacattccagtgc	17	2794416
j5r	MU 1	tctaaagccaaagcttccaaag	17
j6	MU 2	gaaggtatatgctgctgaaccc	17	2433038
j6r	MU 2	cacaaggtccctgataataggc	17
j8	MU 4	ctgtacactgacggcctacaag	17	1761159
j8r	MU 4	gttgtagttccacgaggactgg	17
k1	MU 5	gatcctgacagagagaactggg	17	1605017
k1r	MU 5	gatcctccaaaatgtcttgagc	17
k2	MU 3	ctgtgagcagcttagcaaggag	17	892241
k2r	MU 3	tatgagcctttgcatttctcag	17
k3	MU 6	agacttccctgtggaggattc	17	101603
k3r	MU 6	agacacgcgcaaacttaaaatc	17
k4	MU 7	gaactagcagttcgggaaagac	17	8554675
k4r	MU 7	aaaagtgttctccgttcctttg	17
k5	MU 8	gtccagatccacatcctgaag	17	9343525
k5r	MU 8	gatcaccaggctgcttttatc	17
k7	MU 9	actgcacaaagtgaggggaac	17	16136155
k7r	MU 9	agtccactgaattgcctgtatc	17
k8	MU10	atgcctccacacctaccactac	17	17907689
k8r	MU10	ggaaactgaagagtgagatggg	17
l1	MU 1	gaagaccaagttcaagctgacg	17	18345357
l1r	MU 1	gatgcaggaatagtgcacctg	17
l2	MU 2	agcacctactacctgcatgtcc	17	18426657
l2r	MU 2	gaccaccctaacatcctcattc	17
l3	MU 4	gtgagacgtgtgtcttagcctg	17	18848209
l3r	MU 4	ggttcaaggaggacttcacaac	17
l4	MU 3	atgtcagaattcagtgacgtgg	17	19642879
l4r	MU 3	ttgcttggttcagatagtggtg	17
l5	MU 5	tgcaagtaccaagtggagtacg	17	21263830
l5r	MU 5	cagagtgtggcgatctgaatac	17
l7	MU 6	ctggagtcactactgtgggtcg	17	14311899
l7r	MU 6	atttggtaaccgagaccacacc	17
l8	MU 7	ggtcaggtggttagagcctgag	17	15070567
l8r	MU 7	caagtcaacccactcacctcac	17
p1	MU 8	gcattggcatacttgcccttac	17	15334183
p1r	MU 8	tagacgcttgttctgatgctcc	17
p2	MU10	aaaacgttggctcttaccatgc	17	15363201
p2r	MU10	aaacgtgttacaggcgtctgag	17
p3	MU 9	catgctgattcctttatgctgc	17	15408038
p3r	MU 9	taggggtatcaaaaccacaccc	17
p5	MU 1	gtgctgtgtgtattcagtgggc	17	16143609
p5r	MU 1	tcctctcttcgtgtctcaccac	17
p53_3	MU 9	gcaaaggccactgtttccatag	17	7814894
p53_3r	MU 9	ctactgaggtgacggcataccc	17
p53_4	MU10	cagttacctcctgtgtaccggc	17	7814894
p53_4r	MU10	ctattttgctctggtcccaacg	17
p6	MU 2	aagcctttgctcattcctcaac	17	16656289
p6r	MU 2	cgccttgtctatatgctttccc	17
p7	MU 3	tgatgtcctttgtggtcaaacc	17	17052919
p7r	MU 3	cttggtaccttcccgagttgtc	17
q1	MU 4	ggatttttggtgggcattattc	17	21065807
q1r	MU 4	gtgattactaggcaacgggagg	17
q2	MU 5	tatcggtgtcattcacctttcg	17	21380180
q2r	MU 5	caacaccaaagcaaacccatag	17
q3	MU 9	gagaaaaatcacgacggaaagg	17	21616690
q3r	MU 9	gaatggaaaagcgatccagatg	17
q5	MU 6	atgcaccacattaggtgatcagg	17	22338902
q5r	MU 6	tggctaccttgcaaaaggagag	17
q6	MU 7	gggataccaaagctgtgacctg	17	425255
q6r	MU 7	caagaacccagagatgagcacg	17
q7	MU 8	ccaaaggaatcggaaaatcgac	17	1011587
q7r	MU 8	gggagagcaacgaggagaagac	17
r1	MU10	tggatgactagtgaatgcttggc	17	3446049
r1r	MU10	ttggattcagggtcagatcagc	17
r2	MU 1	cttcgtgctgagctaatgttgc	17	4543789
r2r	MU 1	ctcctcacctgcaatgatgaac	17
r3	MU 3	gtatgtggaggtctccagtcgg	17	5107598
r3r	MU 3	ccgactttcgcttctttgattg	17
r4	MU 2	cagctcaagggttgatctcagg	17	5688222
r4r	MU 2	ccgtctcttattcagcattcgg	17
r5	MU 5	tgttatcacgactccttgcagc	17	5957699
r5r	MU 5	cattgagcgtgattcctctctg	17
r6	MU 4	gagttggtctgaacaaggtggg	17	6227664
r6r	MU 4	ggtgtcattggcttagtccagg	17
r7	MU 6	ttctaatgccatctcaccaggc	17	6565440
r7r	MU 6	ttacagactgcacatcacaaggc	17
r8	MU 9	caggtttgtatgcccgaatagg	17	8220951
r8r	MU 9	ggtgcagtagccttcaatccac	17
s1	MU 7	gagaaacaagagtgcagccacc	17	8848575
s1r	MU 7	ggacagacggttggaagatgag	17
s2	MU 8	gcacgcagtcctgttgaagac	17	9747113
s2r	MU 8	gatcatgaggaaggtctgtggg	17
s3	MU10	aaatactgggtccgcttcttgc	17	9993271
s3r	MU10	agaatctcctccatggtgttgg	17
s4	MU 2	gtcacccaagcacaagactcag	17	10468447
s4r	MU 2	aatcaacactcacccggtcatc	17
s5	MU 1	tcaagctgaagtgaagccagtg	17	10784744
s5r	MU 1	caactctgaatggcagagaccc	17
s6	MU 3	ggtcttctgtttgcctcactgg	17	11665710
s6r	MU 3	gacatacacaagcaggaagggg	17
s7	MU 4	gccctgtacttcgatatggtgc	17	12065792
s7r	MU 4	ttcccgaggaggactcctaaac	17
s8	MU 5	atcccttttcattggttttgcc	17	12738975
s8r	MU 5	agagttgcgactgaatgaaccc	17
t1	MU 6	gcttgtccttccgtcttgagtc	17	13218127
t1r	MU 6	ataaagcaaggaatgacgtggg	17
t2	MU 8	ttggagattccacaagcagttg	17	13949411
t2r	MU 8	gcaggttccacctcatcatgtc	17
t3	MU 7	tgtgttcaaagaaaccgagagg	17	14564117
t3r	MU 7	tggtctaagaggagaggggctc	17
